# Supplementary material for: The impact of the anthropause caused by the COVID-19 pandemic on beach debris accumulation in Maui, Hawaiʻi
Source: PubMed Central journal article supplement (PMC10584821; doi:10.1038/s41598-023-44944-4), 2023-10-18
Supplement: 41598_2023_44944_MOESM1_ESM.pdf [file 41598_2023_44944_MOESM1_ESM.pdf]

**The impact of the anthropause caused by the COVID-19 pandemic on beach debris accumulation in Maui, Hawai‘i**

Jens J. Currie\*<sup>1</sup>, Florence A. Sullivan<sup>1</sup>, Elizabeth Beato<sup>1</sup>, Abigail F. Machernis<sup>1</sup>, Grace L. Olson<sup>1</sup>, Stephanie H. Stack<sup>1,2</sup>

<sup>1</sup>Pacific Whale Foundation, Wailuku, HI 96793, USA

<sup>2</sup>Pacific Whale Foundation Australia, Urangan, QLD 4655, Australia

## Supplementary Materials

**Table 1.** Categories of restrictions and descriptions used to determine lockdown level.

| Category            | Covid-19 Regulation Lockdown Levels                                                                   |                                                                                        |                                                                       |                                      |                                                                     |
|---------------------|-------------------------------------------------------------------------------------------------------|----------------------------------------------------------------------------------------|-----------------------------------------------------------------------|--------------------------------------|---------------------------------------------------------------------|
|                     | Level 1                                                                                               | Level 2                                                                                | Level 3                                                               | Level 4                              | Level 5                                                             |
| Beach Access        | Beach Parks Open for Recreation                                                                       | Beach Parks Open for Recreation                                                        | Beach Parks Open for Recreation                                       | Beach Parks Open for Recreation      | Beach Parks closed (1) or only open for Essential Activities (2)    |
| Mainland Travel     | Mainland Travelers can bypass quarantine with a Pre-test                                              | Mainland Travelers can bypass quarantine with a Pre-test                               | Mainland Travel Mandatory Quarantine                                  | Mainland Travel Mandatory Quarantine | Mainland Travel Mandatory Quarantine                                |
| Interisland Travel  | Interisland Travelers can bypass quarantine with a Pretest OR proof of vaccination within state of HI | Interisland Travelers can bypass quarantine with a Pretest (5) *beginning on 11/9/2020 | Interisland Travel Permitted without Mandatory Quarantine or Pre-test | Interisland Mandatory Quarantine     | Interisland Mandatory Quarantine                                    |
| Mask Mandates       | Mask Mandates; Mask mandates change to only indoor public places 5/25/2021                            | Mask Mandates (4, 6)                                                                   | Mask Mandates                                                         | Mask Mandates (3)                    | Face coverings required in public areas except while exercising (3) |
| Restaurant Industry | Restaurants open for dine-in service                                                                  | Restaurants open for dine-in service                                                   | Restaurants open for dine-in service                                  | Restaurants open for dine-in service | Restaurants are take-out only                                       |
| Start Date          | 4/19/2021                                                                                             | 10/15/2020                                                                             | 6/16/2020                                                             | 6/1/2020;<br>8/6/2020                | 5/4/2020                                                            |
| End Date            | 5/31/2021                                                                                             | 4/18/2021                                                                              | 8/5/2020                                                              | 6/15/2020;<br>10/14/2020             | 5/31/2021                                                           |

*\* (1) Beach Park closures indicate parking lot gates and restroom facilities remain closed and no county lifeguards are on duty. The public can still access the shoreline and ocean for essential activities; (2) Essential activities are defined as "engaging in outdoor activity, such as walking, hiking, running, ocean sports (surfing, stand-up paddle boarding, or fishing); (3) All persons over the age of 5 years old shall wear a face mask or*

cloth covering the nose and mouth while in public settings. This requirement shall not apply to persons engaging in permissible exercise activities, so long as physical distancing requirements are maintained; (4) When persons are stationary and adequately separated, such as occupying a pool lounge chair, beach chair, or towel, no mask is required; however, face coverings must be worn while walking to and from the pool or beach area; (5) Interisland travelers age five and older who provide written confirmation of a negative test result from an approved COVID-19 test administered to the traveler within 72 hours from the last leg of departure prior to arrival into Maui County, are exempt from quarantine; (6) Permitted masks or facial coverings must: completely cover the nose and mouth, have two or more layers of washable, breathable fabric, fit snugly against the sides of your face without gaps. Unpermitted masks or face coverings include masks with exposed external valves, bandanas, face shields without a permitted mask underneath.

**Table 2.** Indicator debris items classified as land sourced.

| Ocean-based              | Land-based               | Other-items           |
|--------------------------|--------------------------|-----------------------|
| Nylon rope/net fragments | Cigarette filters/cigars | Beverage bottles      |
| Buoys/floats             | Straws                   | Plastic bags          |
| Fishing lures/line       | Balloons                 | Packing straps        |
| Spools                   | Fireworks                | Bottle/container caps |
|                          | Golf balls               | Other jugs/containers |
|                          | Golf tees                |                       |
|                          | Syringes                 |                       |
|                          | Personal care products   |                       |
|                          | Flip-flops/slippers      |                       |

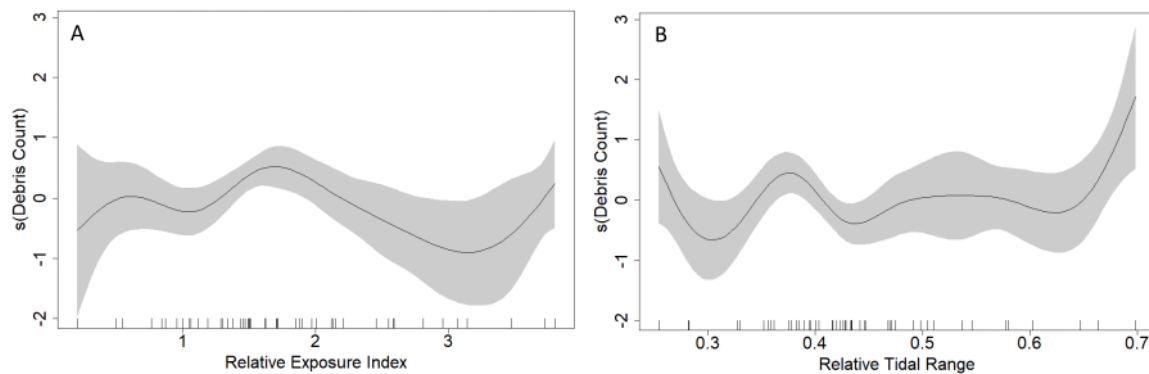

**Supplementary Figure 1.** Results from the best fit generalized additive model (GAM) for debris counts at Site 2 (Ulua Beach) showing (A) model parameter estimates of Relative Exposure Index and (B) Relative Tidal Range. The shaded lines represent the 95% confidence intervals of the parameter estimates. The vertical ticks indicate the locations of observations (i.e. a rugplot).
